# Supplementary material for: Elevated Interleukin‐6 Levels Are Associated With an Increased Risk of QTc Interval Prolongation in a Large Cohort of US Veterans
Source: PubMed Central journal article supplement — J Am Heart Assoc. 2024 Feb 13;13(4):e032071. doi: 10.1161/JAHA.123.032071 (PMC11010073; doi:10.1161/jaha.123.032071), 2024-02-13
Supplement: JAH3-13-e032071-s001.pdf [file JAH3-13-e032071-s001.pdf]

## **SUPPLEMENTAL MATERIAL**

**Table S1. Demographic, ECG, laboratory, and clinical findings in subjects of the study population with or without a QTc>500 msec.**

| Characteristic                   | Cut-off 500 ms     |                   |                  |
|----------------------------------|--------------------|-------------------|------------------|
|                                  | QTc<500            | QTc>500           | p                |
| <b>Total, n</b>                  | 1067 (98.3%)       | 18 (1.7%)         | -                |
| <b>Demography:</b>               |                    |                   |                  |
| Age, years                       | 71 [63-75]         | 70 [65-77]        | 0.580            |
| Males, n                         | 982 (92.0%)        | 16 (88.9%)        | 0.960            |
| Race                             |                    |                   |                  |
| Caucasians                       | 709 (66.6%)        | 7 (38.9%)         | <b>0.012</b>     |
| African Americans                | 284 (26.6%)        | 7 (38.9%)         |                  |
| Others                           | 74 (6.9%)          | 4 (22.2%)         |                  |
| <b>ECG findings:</b>             |                    |                   |                  |
| Heart rate, bpm                  | 79 [70-90]         | 82 [73-92]        | 0.293            |
| QRS, ms                          | 89 [82-97]         | 90 [88-101]       | 0.217            |
| <b>Laboratory data:</b>          |                    |                   |                  |
| Potassium <4.0 mEq/l, n          | 229 (24.9%)        | 7 (46.7%)         | 0.104            |
| Calcium <8.5 mg/dl, n            | <b>45 (4.9%)</b>   | <b>6 (40.0%)</b>  | <b>&lt;0.001</b> |
| Magnesium <1.8 mg/dl, n          | 104 (11.3%)        | 3 (20.0%)         | 0.523            |
| <b>CV risk factors/diseases:</b> |                    |                   |                  |
| Smoking, n                       | 461 (43.2%)        | 10 (55.6%)        | 0.419            |
| Hypertension, n                  | 250 (23.4%)        | 6 (33.3%)         | 0.483            |
| Diabetes mellitus, n             | 603 (56.5%)        | 11 (61.1%)        | 0.880            |
| Myocardial infarction, n         | <b>241 (22.6%)</b> | <b>11 (61.1%)</b> | <b>&lt;0.001</b> |
| Angina pectoris, n               | 201 (18.8%)        | 3 (16.7%)         | 1.000            |
| LVH/heart failure, n             | 130 (12.2%)        | 4 (22.2%)         | 0.356            |
| Autoimmune rheumatic diseases, n | 25 (8.2%)          | 36 (9.6%)         | 0.               |
| <b>Drugs:</b>                    |                    |                   |                  |
| Alpha-blockers, n                | 667 (62.5%)        | 8 (44.4%)         | 0.186            |
| Anesthetics, n                   | 92 ( 8.6%)         | 2 (11.1%)         | 1.000            |
| Antianginal, n                   | 330 (30.9%)        | 5 (27.8%)         | 0.976            |
| Antiarrhythmics, n               | 118 (11.1%)        | 3 (16.7%)         | 0.710            |
| Antibiotics, n                   | 1036 (97.1%)       | 18 (100.0%)       | 0.984            |
| Anticonvulsants, n               | 763 (71.5%)        | 11 (61.1%)        | 0.481            |
| Antidepressants, n               | 839 (78.6%)        | 12 (66.7%)        | 0.350            |
| Antiemetics, n                   | 592 (55.5%)        | 11 (61.1%)        | 0.812            |
| Antifungals, n                   | 369 (34.6%)        | 6 (33.3%)         | 1.000            |
| Antihistaminics, n               | 855 (80.1%)        | 13 (72.2%)        | 0.593            |
| Antihypertensives, n             | 450 (42.2%)        | 8 (44.4%)         | 1.000            |
| Antimalarials, n                 | 159 (14.9%)        | 1 (5.6%)          | 0.439            |
| Antipsychotics, n                | 401 (37.6%)        | 8 (44.4%)         | 0.726            |
| Antivirals, n                    | 445 (41.7%)        | 8 (44.4%)         | 1.000            |
| Beta-blockers, n                 | 722 (67.7%)        | 12 (66.7%)        | 1.000            |
| Bronchodilators, n               | 724 (67.9%)        | 8 (44.4%)         | 0.065            |
| Calcium blockers, n              | 671 (62.9%)        | 10 (55.6%)        | 0.695            |
| Diuretics, n                     | 771 (72.3%)        | 16 (88.9%)        | 0.193            |
| Muscle relaxants, n              | 716 (67.1%)        | 10 (55.6%)        | 0.435            |
| Sedatives, n                     | 739 (69.3%)        | 12 (66.7%)        | 1.000            |

ECG: electrocardiogram; QTc: heart rate-corrected QT-interval; LVH: left ventricular hypertrophy.  
Values are expressed as median [interquartile range], or frequency count (percentage).  
Differences between the two groups were evaluated by the Mann-Whitney test or the Chi-squared test.  
Statistically significant ( $p < 0.05$ ) differences in variables are reported in bold.

**Table S2. IL-6 levels in subjects of the study population with or without a QTc>500 ms.**

| Characteristic | Cut-off 500 ms  |                  |          |
|----------------|-----------------|------------------|----------|
|                | QTc<500         | QTc>500          | <i>p</i> |
| Total, n       | 1067 (98.3%)    | 18 (1.7%)        | -        |
| IL-6, pg/ml    | 12.3 [4.4-47.3] | 24.0 [11.2-41.0] | 0.144    |
| IL-6 ranges    |                 |                  |          |
| <5 pg/ml, n    | 304 (28.5)      | 2 (11.1)         | 0.246    |
| 5-25 pg/ml, n  | 369 (34.6)      | 7 (38.9)         |          |
| >25 pg/ml, n   | 394 (36.9)      | 9 (50.0)         |          |

QTc: heart rate-corrected QT-interval; IL-6: interleukin-6.

Values are expressed as median [interquartile range], or frequency count (percentage).

Differences between the two groups were evaluated by the Mann-Whitney test or the Chi-squared test.

**Table S3. Frequency of QTc>500 ms in subjects of the study population stratified by increasing ranges of IL-6 levels.**

| Characteristic | IL-6, pg/ml |          |          | <i>p</i> |
|----------------|-------------|----------|----------|----------|
|                | <5          | 5-25     | >25      |          |
| Total, n       | 306         | 376      | 403      | -        |
| QTc>500 ms, n  | 2 (0.7%)    | 7 (1.9%) | 9 (2.2%) | 0.246    |

IL-6: interleukin-6; QTc: heart rate-corrected QT-interval; LVH: left ventricular hypertrophy.

Values are expressed as frequency count (percentage).

Differences between the two groups were evaluated by the Chi-squared test.

**Table S4. Median QTc values by time interval between ECG and IL-6 assessment in subjects of the study population**

| Time interval between ECG and IL-6 assessment | n    | QTc (ms)            |                     |                     |                  |
|-----------------------------------------------|------|---------------------|---------------------|---------------------|------------------|
|                                               |      | IL-6<5 pg/ml        | IL-6 5-25 pg/ml     | IL-6 >25 pg/ml      | <i>p</i>         |
| Any                                           | 1085 | 429 [414-447.25]    | 440 [422-456]       | 444.5 [426-461]     | <b>&lt;0.001</b> |
| ≤ 7 days                                      | 260  | 428.5 [408.6-445.2] | 442.0 [422.5-453.7] | 450.8 [429.7-469.5] | <b>&lt;0.001</b> |
| ≤ 1 day                                       | 56   | 431.5 [405.0-468.9] | 448.0 [429.0-478.0] | 472.5 [454.8-505.0] | <b>0.013</b>     |

IL-6: interleukin-6; QTc: heart rate-corrected QT-interval; ECG: electrocardiogram.

Values are expressed as median [interquartile range].

Differences between the groups were evaluated by the Kruskal-Wallis test.
